1 **Transgenic pyrimethamine-resistant *P. falciparum* reveals transmission blocking**  
2 **potency of P218, a novel antifolate**

3 Navaporn Posayapisit<sup>#</sup>, Jutharat Pengon<sup>#</sup>, Parichat Prommana, Molnipha Shoram, Yongyuth Yuthavong,  
4 Chairat Uthaipibull, Sumalee Kamchonwongpaisan, and Natapong Jupatanakul\*

5

6 National Center for Genetic Engineering and Biotechnology (BIOTEC), Pathum Thani, Thailand 12120.

7 # These authors equally contribute to this manuscript.

8 **\*Corresponding Author**

9 Email: [natapong.jup@biotec.or.th](mailto:natapong.jup@biotec.or.th); Tel +66-2-564-6700, Fax: +66-2-564-6707

10

11 **Abstract**

12 Antimalarial drug which target more than one life stage of the parasite are valuable tools in the fight  
13 against malaria. Previous generation of antifolate drugs are able to inhibit replicative stages of drug-sensitive,  
14 but not resistant parasites in humans, and mosquitoes. The lack of reliable gametocyte-producing, antifolate  
15 resistant *P. falciparum* hindrance the development of new antifolate compounds against mosquito stages. We  
16 used CRISPR-Cas9 technology to develop transgenic gametocyte producing *P. falciparum* with quadruple  
17 mutations in *dhfr* gene, using NF54 as a parental strain. The transgenic parasites gained pyrimethamine  
18 resistance while maintaining the gametocyte producing activity. In contrast to pyrimethamine that cannot inhibit  
19 exflagellation of the quadruple *dhfr* mutant parasite, the novel antifolate P218 showed a good potency for  
20 exflagellation inhibition (exflagellation IC<sub>50</sub> 10.74 ± 4.22 nM). The exflagellation IC<sub>50</sub> was 5.3 times lower than  
21 erythrocytic IC<sub>50</sub> suggesting that the human to mosquito transmission poses as a strong barrier to prevent  
22 P218 resistant parasite among population. This study demonstrates that P218 can be considered as a highly  
23 potent tool to prevent the spread of antifolate resistant parasites.

24

25 **Keywords:** antifolate; drug resistance; malaria; dihydrofolate reductase; transmission blocking; CRISPR-  
26 Cas9

## 27 Graphical Abstract

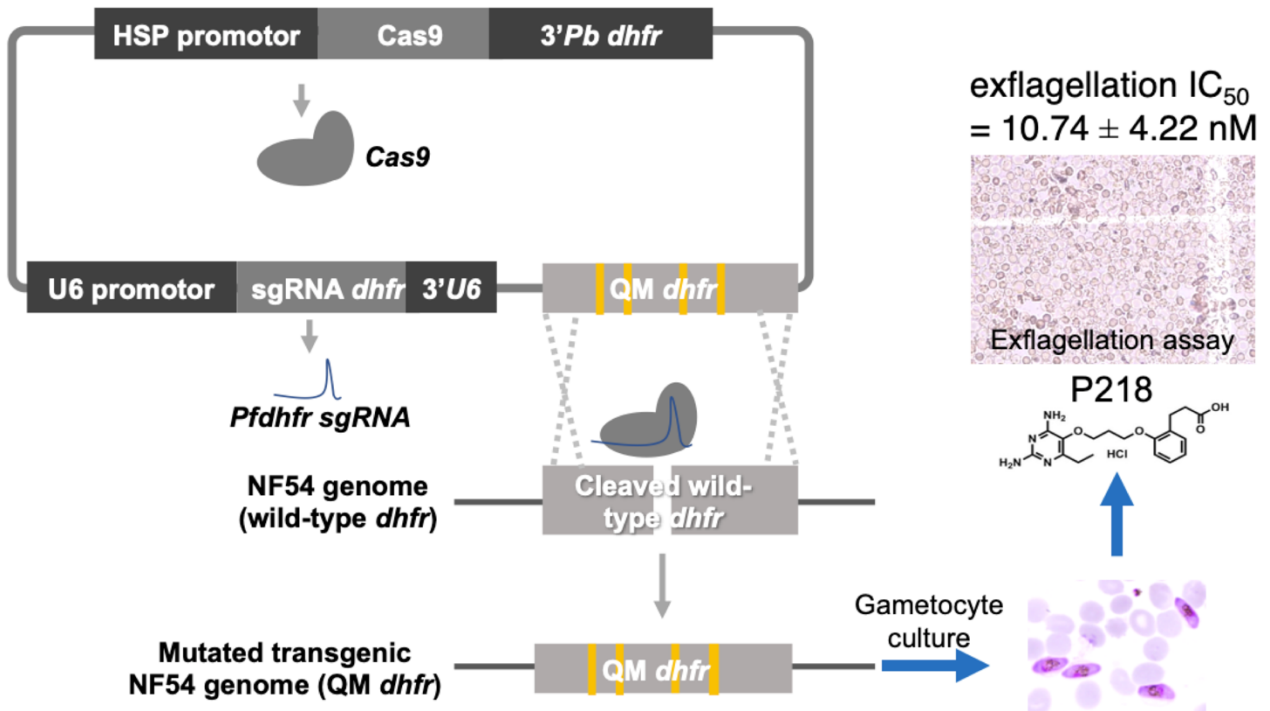

28

## 29 Research Highlights

- 30 - Transgenic gametocyte producing pyrimethamine resistant *P. falciparum* was generated.
- 31 - P218 asexual stage  $IC_{50}$  in NF54-4mut*Pfdhfr* was  $56.94 \pm 15.69$  nM.
- 32 - P218 exflagellation  $IC_{50}$  in NF54-4mut*Pfdhfr* was  $10.74 \pm 4.22$  nM.
- 33 - P218 exflagellation  $IC_{50}$  in NF54-4mut*Pfdhfr* is 5.3 times lower than erythrocytic  $IC_{50}$ .
- 34 - P218 is an invaluable tool for malaria treatment and transmission control.

## 35 **1. Introduction**

36 Malaria is a major public health problem that impact many areas of the world causing health, social, and  
37 economic impact. The disease is the deadliest mosquito-borne disease causing more than 400,000 deaths from  
38 over 200 million cases per year, and most of the death from malaria occur in children under age 5 (World Health  
39 Organization, 2019). While effective vaccines are anticipated, antimalarial drugs are still the major means to  
40 reduce burden of malaria infection in humans. However, emergence of resistant parasites to the current  
41 antimalarials in clinical use has highlighted the importance of antimalarial drug discovery.

42 During development in the erythrocytic stage, a small percentage of the malaria parasites differentiate  
43 into male and female gametocytes, the mosquito-infective stage, which are taken up by mosquitoes during blood  
44 meal. Once inside the mosquito gut, changes in environment triggers gametocytes activation (Josling & Llinás,  
45 2015). Male gametocytes undergo exflagellation, which consists of three rounds of DNA replication and  
46 differentiation to generate motile parasites called microgametes that can swim through blood meal in the  
47 mosquito gut to find and mate with activated female gametocytes (macrogamete). Fertilized diploid zygotes then  
48 undergo meiosis and cellular differentiation to generate motile and invasive ookinetes, which then invade the  
49 mosquito gut epithelium to form oocysts at around 24 hours after infectious blood meal. The number of parasites  
50 that survive these processes in mosquito infection is extremely low and can be considered as a major bottleneck  
51 in malaria transmission (Smith et al., 2014). Therefore, the control measures targeting these transmission  
52 bottlenecks will be highly effective for malaria control. *Plasmodium* oocysts in the mosquito gut undergo  
53 endomitosis to generate thousands of sporozoites over the course of two weeks. Mature sporozoites later emerge  
54 from the oocysts then migrate and reside in the mosquito salivary glands before a small proportion of them are  
55 injected into human hosts when the infected mosquitoes take a new blood meal. For the goal of malaria  
56 elimination, ideal drugs should, in addition to being effective in the pre-erythrocytic and erythrocytic stages, also  
57 be able to block the transmission from infected humans to mosquitoes (transmission-blocking) and prevent  
58 infection from infectious mosquito bites in human (prophylaxis).

59 The folate pathway, involving in the one-carbon metabolism, is required for DNA and RNA synthesis as  
60 well as other metabolic processes. It is essential for parasite development in both human and insect hosts.  
61 Antifolate compounds that target dihydrofolate reductase (DHFR) such as cycloguanil (CG) and pyrimethamine  
62 (PYR) have long been used in combination with sulfa drugs for treatment and prophylaxis against malaria since  
63 1940s-1950s (A Gregson, 2005). However, the malaria parasites soon developed resistance to these drugs in  
64 1960s and it was shown that the mutation in DHFR gene is a major contributing factor to the parasite's resistance  
65 to DHFR inhibitor (Aric Gregson & Plowe, 2005; Müller & Hyde, 2013; Yuthavong et al., 2006). The crystal  
66 structures for the wild-type bifunctional DHFR-TS and the highly PYR-resistant quadruple mutant enzyme (QM)

67 from *P. falciparum* (Yuvaniyama et al., 2003) gave the structural basis of the lower binding affinity of PYR to  
68 quadruple and other mutants (Cowman et al., 1988; Foote et al., 1990; Peterson et al., 1988, 1990; Sirawaraporn  
69 et al., 1997). This information was used to design P218, a 2,4-diaminopyrimidine with flexible side chain of 2'-  
70 carboxyethylphenyl group (Yuthavong et al., 2012). Although the effectiveness of P218 in antifolate-resistant  
71 malaria has been established, the ability of the compound to inhibit mosquito stages of antifolate resistant *P.*  
72 *falciparum* has been much less studied. One of the obstacles for such study was that the laboratory maintained  
73 quadruple *dhfr* mutant parasites such as the V1/S strain cannot develop into gametocytes.

74 With the advance in *Plasmodium* genetic manipulation, it is possible to generate drug resistant parasite  
75 using molecular techniques. Previous study showed that NF54 strain *P. falciparum* could preserve an ability to  
76 develop into gametocytes even after half a year of asexual stage culture, while the 3D7 strain quickly lose the  
77 gametocyte producing (Delves et al., 2016). Because the generation of transgenic parasite is a long process,  
78 the ability of the NF54 strain to preserve gametocyte producing capability is suitable for the generation of  
79 transgenic parasite to study extraerythrocytic stages.

80 In the present study, we developed transgenic gametocyte producing *P. falciparum* with quadruple  
81 mutation in *dhfr* gene to use as a model for antifolate drug testing in the mosquito stage. With CRISPR-Cas9  
82 technology, the wild-type *dhfr* gene of gametocyte producing NF54 strain *P. falciparum* was replaced by  
83 quadruple *dhfr* mutant gene with amino acid mutations at N51I, C59R, S108N, and I164L, the same as the V1/S  
84 strain. The transgenic parasite gained antifolate resistance as confirmed in the asexual blood stage while  
85 maintaining the gametocyte producing activity. Finally, the activity of P218 in transmission blocking was  
86 determined by male gametocyte exflagellation assay.

87

## 88 **2. Materials and Methods**

### 89 **2.1 Ethic statement**

90 Human serum and erythrocytes from donors used for *P. falciparum* culture were obtained under the  
91 regulation of the Ethics Committee for Human Research, National Science and Technology Development Agency  
92 (NSTDA), following an approved protocol (document number 0021/2560).

93

### 94 **2.2 *P. falciparum* strains and asexual stage culture**

95 *P. falciparum* strain NF54 (Patient Line E) MRA-1000 was used as a parental strain for transgenic parasite  
96 construction. The parasites comprise a gametocyte-producing strain with wild-type *dhfr* gene.

97 Asexual blood stage of *P. falciparum* was cultured *in vitro* in human O+ erythrocytes and RPMI medium  
98 (Gibco Cat. no. 11875) supplemented with 5% heat-inactivated human serum, 0.125% Albumax I (Gibco Cat.

99 no. 11020), 5.94 g/L HEPES (Sigma Cat. no. H4034), 2 g/L glucose (Sigma Cat. no. G7021), 5 g/L hypoxanthine  
100 (Sigma Cat. no. H9377), and 40 mg/L gentamycin sulfate at 37 °C under atmosphere of 94% N<sub>2</sub> + 5% CO<sub>2</sub> + 1%  
101 O<sub>2</sub>.

102 Asexual blood stage synchronization was performed by sorbitol treatment. Briefly *P. falciparum* infected  
103 erythrocytes were incubated with 5 volumes of 5% sorbitol then incubated at 37 °C for 15 minutes. After  
104 incubation, infected erythrocytes were harvested by centrifugation at 1,200 x *g* for 3 minutes. Pelleted  
105 erythrocytes were washed with 5 mL of prewarmed RPMI medium before sub-culturing in fresh erythrocytes and  
106 complete RPMI to desired hematocrit and parasitemia.

107

### 108 **2.3 Construction of transgenic gametocyte-producing *P. falciparum* with mutations on *dhfr* gene**

109 The *P. falciparum* NF54 strain (MRA-1000) was used as a parental strain for transgenic parasite  
110 production as it is an efficient gametocyte-producing strain (Figure 1). The pCas.SgDHFR.HR.V1S generated in  
111 previous study consist of Cas9 expression cassette under a control of heat shock promotor and *Pbdhfr* terminator  
112 from pUF1-Cas9 plasmid (Ghorbal et al., 2014), single-guide RNA (sgRNA) specific to *P. falciparum dhfr* (*Pfdhfr*)  
113 under a control of *P. falciparum* U6 promotor and terminator from pL7 plasmid (Ghorbal et al., 2014), and  
114 homology repair quadruple *dhfr* mutant from V1/S strain with mutated PAM site to prevent Cas9 cleavage in the  
115 transgenic parasite. Sequence of the pCas.SgDHFR.HR.V1S was in the supplementary information 1.  
116 Synchronized ring stage of NF54 strain parasite was transfected with 100 µg of pCas.SgDHFR.HR.V1S plasmid  
117 as previously described (Somsak et al., 2011). The transfected parasite was then selected using 1 µM  
118 pyrimethamine from day 2 for 14 days, then cloned by limiting dilution method in 96-well plates. The *dhfr* gene  
119 from the cloned parasite was then amplified with PfDT Nhe Forward primer (5'  
120 GATGCTAGCATGATGGAACAAGTCTGCG 3') PfDT3 Hind Reverse primer  
121 (5'GCAAGCTTTTAAGCAGCCATATCCATTG 3') then sent for sequencing with PfD779-pCasR primer (5'  
122 GTGACACTATAGAATACTCAAGCTTTGACATGTATCTTTGTCATC 3'). The mutations of DHFR gene were  
123 confirmed by DNA sequencing. The resulting transgenic parasite was called NF54-4mut*Pfdhfr*. The schematic  
124 representation of this plasmid is given in Figure 1.

125

### 126 **2.4 Assessment of susceptibility of the transgenic NF54-4mut*Pfdhfr* to antimalarial drugs in asexual** 127 **blood stage**

128 To confirm that the introduction of DHFR mutations to the transgenic NF54-4mut*Pfdhfr* confers antifolate  
129 resistance, the transgenic NF54-4mut*Pfdhfr* was tested for its susceptibility to antifolate drugs: pyrimethamine  
130 and P218 using Malaria SYBR Green I-base fluorescence (MSF) assay (Johnson et al., 2007).

131 Dihydroartemisinin (DHA) was used as an unrelated drug control. Drug susceptibility of the transgenic parasite  
132 was compared with the parental NF54 and V1/S *P. falciparum* parasites. Briefly, 90  $\mu$ l of 1% ring-stage  
133 synchronized parasites at 2% hematocrit were transferred into 96-well flat bottom microtiter plate and treated  
134 with 10  $\mu$ l of serial dilution of each drug prepared in DMSO. The plates were then incubated at 37 °C under  
135 atmosphere of 94% N<sub>2</sub> + 5% CO<sub>2</sub> + 1% O<sub>2</sub> for 48 hours followed by an addition of 100  $\mu$ l of SYBR Green I dye  
136 (Invitrogen, Cat. no. S7563) in lysis buffer (20 mM Tris, 5mM EDTA, 0.008% w/v saponin, 0.08% v/v Triton X-  
137 100, pH 7.5). Fluorescence signal was measured with a microplate reader (excitation at 435 nm and emission at  
138 535 nm). The SYBR Green I signal from drug-treated parasites were normalized to untreated (DMSO) control  
139 parasite in the same experiment.

140

#### 141 **2.5 *P. falciparum* gametocyte culture**

142 *P. falciparum* gametocytes were cultured following previously published protocol with slight modifications  
143 (Delves et al., 2016; Gupta et al., 1985). The culture was started with 1% parasitemia of synchronized ring stage,  
144 4% hematocrit and the medium was changed daily for 16 days. To prevent reinvasion of asexual stage parasite,  
145 N-acetyl-glucosamine (NAG, Sigma, Cat. No. A3286) was added to the culture to a final concentration of 50 mM  
146 from day 6 to day 11 of the culture. *P. falciparum* gametocyte development was monitored using Giemsa-stained  
147 thin blood smear.

148

#### 149 **2.6 Male gamete activation (exflagellation) assay in *P. falciparum***

150 The male gamete activation assay was performed following a slight modification of an established  
151 protocol (Delves et al., 2013, 2016). In brief, *in vitro* gametocyte culture was set up as described above. On day  
152 13 of the culture, the gametocytes were treated with P218 or other antimalarial compounds at 37 °C for 48 hours.  
153 Half of the media supplemented with antimalarial compounds was changed and then incubated for another 24  
154 hours before exflagellation readout. The male gametocyte exflagellation was induced using ookinetes culture  
155 medium (RPMI 1640 with 25 mM HEPES, 2 mM glutamine (Sigma, Cat no. G7513), supplemented with 100  $\mu$ M  
156 xanthurenic acid (Sigma, Cat. no. D120804) and observed with hemocytometer under a light-contrast  
157 microscope. For each replicate, eight fields of view were recorded with Olympus video camera system (Model  
158 DP71) then the total number of exflagellation sites/1,000 red blood cells was calculated then exflagellation  
159 inhibition was compared to the DMSO control.

160

#### 161 **2.7 Statistical analyses**

162 Dose response analyses were performed using 4-parameter log-logistic regression model using the *drc*  
163 package (Ritz et al., 2015) in the R program (R Core Team, 2020).

### 164 **3. Results**

#### 165 **3.1 Generation of gametocyte-producing *P. falciparum* with mutations on DHFR gene**

166 The pCas.SgDHFR.HR.V1S plasmid was successfully transfected into the gametocyte producing NF54  
167 strain. The sequencing results confirmed that the nucleotide at the amino acid position 51, 59, 108, and 164 of  
168 the NF54-4mut*Pfdhfr* parasite was successfully mutated (Figure 2).

169 Because the main goal of generating the transgenic NF54-4mut*Pfdhfr* was to obtain the gametocyte  
170 producing parasites with quadruple mutations on the *dhfr* gene, the parasite was then checked for its ability to  
171 develop into gametocyte. The NF54-4mut*Pfdhfr* gametocyte was cultured alongside with the NF54 parental and  
172 V1/S strain. The result showed that the NF54-4mut*Pfdhfr* maintain the gametocyte-producing phenotype of the  
173 NF54 parental strain with the gametocytemia yield of ~4-10%, which is comparable to the wild-type NF54 strain  
174 (Figure 3A). Male gametocytes of the NF54-4mut*Pfdhfr* was highly active and could be further used for  
175 exflagellation assay to screen for transmission blocking antifolate compounds (Figure 3B).

176

#### 177 **3.2 Asexual erythrocytic stage of the transgenic NF54-4mut*Pfdhfr* has similar antimalarial drug** 178 **sensitivity compared to the quadruple mutant V1/S strain**

179 After the transgenic parasite was validated and cloned, we then compared its asexual stage  
180 antimalarial drug susceptibility to those of the NF54 and V1/S strain (Figure 4, Table 1). While the wild-type  
181 NF54 strain is susceptible to PYR with IC<sub>50</sub> at 126.56 nM, the quadruple mutant V1/S strain had PYR IC<sub>50</sub> at  
182 65.57 μM or 518-fold higher than that of the wild-type NF54. The replacement of wild-type *dhfr* with quadruple  
183 mutant *dhfr* in the transgenic NF54-4mut*Pfdhfr* increased PYR IC<sub>50</sub> to 87.59 μM or 692-fold increase.

184 Similar to a previous study (Yuthavong et al., 2012), our result demonstrated that P218 has better  
185 asexual stage antimalarial activity against both wild-type and quadruple mutant parasites compared to PYR.  
186 IC<sub>50</sub> of P218 in NF54, V1/S, and NF54-4mut*Pfdhfr* were 6.15, 100.69, and 56.94 nM, respectively (Figure 4,  
187 Table 1). The increase in IC<sub>50</sub> correspond to 16- and 9-fold increase for the V1/S, and NF54-4mut*Pfdhfr*  
188 strains. These increases are far lower than those for pyrimethamine, with ratios of 32 for V1/S and 75 for  
189 NF54-4mut*Pfdhfr*, validating P218 efficacy against pyrimethamine-resistant parasites.

190 When treated with DHA, an antimalarial compound in different class, the wild-type and transgenic  
191 parasites had similar IC<sub>50</sub> (Figure 4, Table 1). These results demonstrated that the genetic modification  
192 specifically increased antifolate resistance.

193

### 194 **3.3 P218 effectively inhibits male gametocyte exflagellation of the transgenic antifolate resistant** 195 **parasite**

196 The exflagellation of transgenic and original NF54 strain *P. falciparum* was tested with various  
197 antimalarial compounds including PYR, P218, DHA, and methylene blue (MB, an antimalarial compound with  
198 confirmed exflagellation inhibition activity) (Figure 5). The exflagellation inhibition of DHA and MB were similar  
199 between the NF54 and NF54-4mut*Pfdhfr* parasites suggesting that the replacement of the wild-type *dhfr* to the  
200 quadruple mutant *dhfr* only had impact on the parasite's susceptibility to antifolate compounds (Figure 5, Table  
201 2).

202 As expected, the quadruple *dhfr* mutation substantially increased parasite's susceptibility to previous  
203 generation of antifolate compound such as PYR. PYR exflagellation IC<sub>50</sub> of the NF54-4mut*Pfdhfr* parasite was  
204 99.89 μM, a 3,626 fold-increase from 27.55 nM in the wild-type *dhfr* NF54 parasite (Figure 5, Table 2). In contrast,  
205 exflagellation IC<sub>50</sub> of P218 in the transgenic quadruple *dhfr* mutant, was 10.74 nM, a 3-fold increase from 4.06  
206 nM in the wild-type (Figure 5, Table 2). Interestingly, the exflagellation IC<sub>50</sub> of the antifolate compounds were  
207 lower than asexual stage IC<sub>50</sub> except for the PYR IC<sub>50</sub> in NF54-4mut*Pfdhfr*. This suggests that male gametocyte  
208 exflagellation might be more susceptible to antifolate than the asexual blood stage.

209

### 210 **4. Discussion**

211 In addition to vector control, antimalarial drugs with activity against multiple stages of the parasite life  
212 cycle form another key component to achieve the goal of malaria elimination and eradication. Our research group  
213 developed novel, rationally-designed antifolate compounds that can inhibit asexual stage of both wild-type and  
214 quadruple *dhfr* mutant *P. falciparum* at nanomolar level, with P218 as a lead compound (Yuthavong et al., 2012).  
215 However, the activity of P218 against mosquito stage of antifolate resistant parasite, especially for the quadruple  
216 mutant parasite, has up to now only been implied without experimental evidence. The laboratory strain of  
217 quadruple mutant parasite (V1/S strain) cannot develop into gametocyte stage, thus limiting the transmission  
218 blocking activity screening pipeline against quadruple *dhfr* mutant parasite.

219 To develop a model to determine transmission blocking activity of P218 and other compounds on  
220 quadruple *dhfr* mutant parasite, we successfully generated transgenic NF54 strain of *P. falciparum* harboring the  
221 *dhfr* gene with quadruple mutations identical to the V1/S strain. The resulting transgenic parasite showed an  
222 increased resistance to antifolate drugs in asexual blood stage at a similar level to that of the V1/S parasite while  
223 preserving the ability to develop into gametocytes, which can be used for male gametocyte exflagellation assay.  
224 The ability of NF54 parasite to maintain gametocyte producing property even after a long transfection and cloning  
225 process (up to 2-3 months from transfection until the cloned parasites were obtained) was evident in our study.



226 This demonstrates the possibility to use this approach with other drug targets to study the effect of genetic  
227 variations in drug susceptibility of extraerythrocytic stages in the future.

228 In this study male gametocyte exflagellation was used as a proxy to determine transmission blocking  
229 efficiency of P218 because 1) antifolate compounds only target male but not female gametocyte activation  
230 (Delves et al., 2013), 2) the exflagellation assay was performed in multi well format *in vitro* thus suitable for testing  
231 multiple concentrations for dose response analysis. Our results showed that the exflagellation of male  
232 gametocytes are more sensitive to antifolates when compared to the asexual blood stage, which is in  
233 concordance with the previously published data of PYR treatment, which reported asexual stage IC<sub>50</sub> at 17 nM  
234 and exflagellation IC<sub>50</sub> at 8.7 nM (Delves et al., 2013).

235 Transmission from human to mosquito is a major bottleneck for *P. falciparum* life cycle (Smith et al.,  
236 2014). Previous experimental infection of *Anopheles gambiae* mosquitoes with blood from *P. falciparum*-infected  
237 patients carrying high gametocytemia (an average of 433.5 gametocytes in each mosquito midgut) resulted in  
238 an average of 5.5 ookinete (91.9% prevalence) on day 1, and two oocyst (37.8 % prevalence) on day 7 (Gouagna  
239 et al., 1998). With this low number of ookinete and oocyst able to establish infection in the mosquito midgut, the  
240 highly potent P218 should drastically prevent malaria transmission from P218-treated patients to mosquito even  
241 at nanomolar plasma concentration. This transmission blocking potential remains even for pyrimethamine-  
242 resistant parasites, where the exflagellation of which is still effectively inhibited.

243 Another important aspect from this study is that P218 will be very effective in preventing geographical  
244 expansion of drug resistant parasites. Our previous study suggested that additional mutation on *dhfr* gene will  
245 impose strong fitness cost to the parasite because the enzyme will have less catalytic activity to natural substrate  
246 (Yuthavong et al., 2012). Additionally, even if the parasite gains higher resistance to P218, the higher sensitivity  
247 of male gametocyte compared to the erythrocytic stage (exflagellation IC<sub>50</sub> was 5.3 times lower than erythrocytic  
248 IC<sub>50</sub>) will pose a second stronger barrier to prevent the spread of the P218 resistant parasite from that individual  
249 to other humans through mosquito. This is a very important aspect for the malaria elimination effort because the  
250 compound can prevent the geographical expansion of antifolate resistant parasites.

251 In summary, this study used CRISPR-Cas9 technology to generate a transgenic gametocyte producing  
252 *P. falciparum* with quadruple *dhfr* mutant replacing the wild-type *dhfr*. The parasite was then used to demonstrate  
253 that P218, a novel antifolate compound, is highly active against erythrocytic and mosquito stages of *P. falciparum*  
254 with quadruple mutations on *dhfr* gene. The compound is thereby an invaluable tool for malaria treatment and  
255 transmission control with the goal of malaria elimination.

256 **Acknowledgements**

257 This work was financially supported by the NSTDA Core Research grant (P-1850116) to SK, and BIOTEC  
258 Research unit director initiative grant to NJ (P-1851424) and CU (P-1551235). *P. falciparum* strain NF54 (Patient  
259 Line E) MRA-1000 contributed by Megan G. Dowler was obtained through BEI Resources, NIAID, NIH.

260

261 **References**

262 Cowman, A. F., Morry, M. J., Biggs, B. A., Cross, G. A., & Foote, S. J. (1988). Amino acid changes linked to  
263 pyrimethamine resistance in the dihydrofolate reductase-thymidylate synthase gene of *Plasmodium*  
264 *falciparum*. *Proceedings of the National Academy of Sciences of the United States of America*, *85*(23),  
265 9109–9113. <https://doi.org/10.1073/pnas.85.23.9109>

266 Delves, M. J., Ruecker, A., Straschil, U., Lelièvre, J., Marques, S., López-Barragán, M. J., Herreros, E., &  
267 Sinden, R. E. (2013). *Male and female Plasmodium falciparum mature gametocytes show different*  
268 *responses to antimalarial drugs*. *57*(7), 3268–3274. <https://doi.org/10.1128/aac.00325-13>

269 Delves, M. J., Straschil, U., Ruecker, A., Miguel-Blanco, C., Marques, S., Dufour, A. C., Baum, J., & Sinden,  
270 R. E. (2016). Routine in vitro culture of *P. falciparum* gametocytes to evaluate novel transmission-blocking  
271 interventions. *Nature Protocols*, *11*(9), 1668–1680. <https://doi.org/10.1038/nprot.2016.096>

272 Foote, S. J., Galatis, D., & Cowman, A. F. (1990). Amino acids in the dihydrofolate reductase-thymidylate  
273 synthase gene of *Plasmodium falciparum* involved in cycloguanil resistance differ from those involved in  
274 pyrimethamine resistance. *Proceedings of the National Academy of Sciences*, *87*(8), 3014–3017.  
275 <https://doi.org/10.1073/pnas.87.8.3014>

276 Ghorbal, M., Gorman, M., Macpherson, C. R., Martins, R. M., Scherf, A., & Lopez-Rubio, J.-J. (2014). Genome  
277 editing in the human malaria parasite *Plasmodium falciparum* using the CRISPR-Cas9 system. *Nature*  
278 *Biotechnology*, *32*(8), 819–821. <https://doi.org/10.1038/nbt.2925>

279 Gouagna, L. C., Gouagna, L. C., Mulder, B., Mulder, B., Noubissi, E., Noubissi, E., Tchuinkam, T., Tchuinkam,  
280 T., Jan Peter Verhave, Boudin, C., Boudin, C., & Boudin, C. (1998). The early sporogonic cycle of  
281 *Plasmodium falciparum* in laboratory-infected *Anopheles gambiae*: An estimation of parasite efficacy.  
282 *Tropical Medicine & International Health*, *3*(1), 21–28. <https://doi.org/10.1046/j.1365-3156.1998.00156.x>

283 Gregson, A. (2005). Mechanisms of Resistance of Malaria Parasites to Antifolates. *Pharmacological Reviews*,  
284 *57*(1), 117–145. <https://doi.org/10.1124/pr.57.1.4>

285 Gregson, Aric, & Plowe, C. V. (2005). Mechanisms of Resistance of Malaria Parasites to Antifolates.  
286 *Pharmacological Reviews*, *57*(1), 117–145. <https://doi.org/10.1124/pr.57.1.4>

- 287 Gupta, S. K., Schulman, S., & Vanderberg, J. P. (1985). Stage-dependent toxicity of N-acetyl-glucosamine to  
288 *Plasmodium falciparum*. *The Journal of Protozoology*, 32(1), 91–95. <https://doi.org/10.1111/j.1550->  
289 7408.1985.tb03020.x
- 290 Johnson, J. D., Denuff, R. A., Gerena, L., Lopez-Sanchez, M., Roncal, N. E., & Waters, N. C. (2007).  
291 Assessment and Continued Validation of the Malaria SYBR Green I-Based Fluorescence Assay for Use in  
292 Malaria Drug Screening. *Antimicrobial Agents and Chemotherapy*, 51(6), 1926–1933.  
293 <https://doi.org/10.1128/AAC.01607-06>
- 294 Josling, G. A., & Llinás, M. (2015). Sexual development in *Plasmodium* parasites: Knowing when it's time to  
295 commit. *Nature Reviews Microbiology*, 13(9), 573–587. <https://doi.org/10.1038/nrmicro3519>
- 296 Müller, I. B., & Hyde, J. E. (2013). Folate metabolism in human malaria parasites—75 years on. *Molecular and*  
297 *Biochemical Parasitology*, 188(1), 63–77. <https://doi.org/10.1016/j.molbiopara.2013.02.008>
- 298 Peterson, D. S., Milhous, W. K., & Wellems, T. E. (1990). Molecular basis of differential resistance to  
299 cycloguanil and pyrimethamine in *Plasmodium falciparum* malaria. *Proceedings of the National Academy*  
300 *of Sciences*, 87(8), 3018–3022. <https://doi.org/10.1073/pnas.87.8.3018>
- 301 Peterson, D. S., Walliker, D., & Wellems, T. E. (1988). Evidence that a point mutation in dihydrofolate  
302 reductase-thymidylate synthase confers resistance to pyrimethamine in *falciparum* malaria. *Proceedings*  
303 *of the National Academy of Sciences*, 85(23), 9114–9118. <https://doi.org/10.1073/pnas.85.23.9114>
- 304 R Core Team. (2020). *R: The R Project for Statistical Computing* (3.6.3) [Computer software]. R Foundation  
305 for Statistical Computing. <https://www.r-project.org/>
- 306 Ritz, C., Baty, F., Streibig, J. C., & Gerhard, D. (2015). *Dose-Response Analysis Using R*. 10(12), e0146021.  
307 <https://doi.org/10.1371/journal.pone.0146021>
- 308 Sirawaraporn, W., Sathitkul, T., Sirawaraporn, R., Yuthavong, Y., & Santi, D. V. (1997). Antifolate-resistant  
309 mutants of *Plasmodium falciparum* dihydrofolate reductase. *Proceedings of the National Academy of*  
310 *Sciences*, 94(4), 1124–1129. <https://doi.org/10.1073/pnas.94.4.1124>
- 311 Smith, R. C., Vega-Rodríguez, J., & Jacobs-Lorena, M. (2014). The *Plasmodium* bottleneck: Malaria parasite  
312 losses in the mosquito vector. *Memórias Do Instituto Oswaldo Cruz*, 109(5), 644–661.  
313 <https://doi.org/10.1590/0074-0276130597>
- 314 Somsak, V., Uthaipibull, C., Prommana, P., Srichairatanakool, S., Yuthavong, Y., & Kamchonwongpaisan, S.  
315 (2011). Transgenic *Plasmodium* parasites stably expressing *Plasmodium vivax* dihydrofolate reductase-  
316 thymidylate synthase as in vitro and in vivo models for antifolate screening. *Malaria Journal*, 10(1), 1–10.  
317 <https://doi.org/10.1186/1475-2875-10-291>
- 318 World Health Organization. (2019). *World Malaria Report 2019*. WORLD HEALTH ORGANIZATION.

- 319 Yuthavong, Y., Kamchonwongpaisan, S., Leartsakulpanich, U., & Chitnumsub, P. (2006). Folate metabolism  
320 as a source of molecular targets for antimalarials. *Future Microbiology*, 1(1), 113–125.  
321 <https://doi.org/10.2217/17460913.1.1.113>
- 322 Yuthavong, Y., Tarnchompoo, B., Vilaivan, T., Chitnumsub, P., Kamchonwongpaisan, S., Charman, S. A.,  
323 McLennan, D. N., White, K. L., Vivas, L., Bongard, E., Thongphanchang, C., Taweechai, S.,  
324 Vanichtanankul, J., Rattanajak, R., Arwon, U., Fantauzzi, P., Yuvaniyama, J., Charman, W. N., & Matthews,  
325 D. (2012). Malarial dihydrofolate reductase as a paradigm for drug development against a resistance-  
326 compromised target. *Proceedings of the National Academy of Sciences*.  
327 <https://doi.org/10.1073/pnas.1204556109>
- 328 Yuvaniyama, J., Chitnumsub, P., Kamchonwongpaisan, S., Vanichtanankul, J., Sirawaraporn, W., Taylor, P.,  
329 Walkinshaw, M. D., & Yuthavong, Y. (2003). Insights into antifolate resistance from malarial DHFR-TS  
330 structures. *Nature Structural & Molecular Biology*, 10(5), 357–365. <https://doi.org/10.1038/nsb921>
- 331  
332

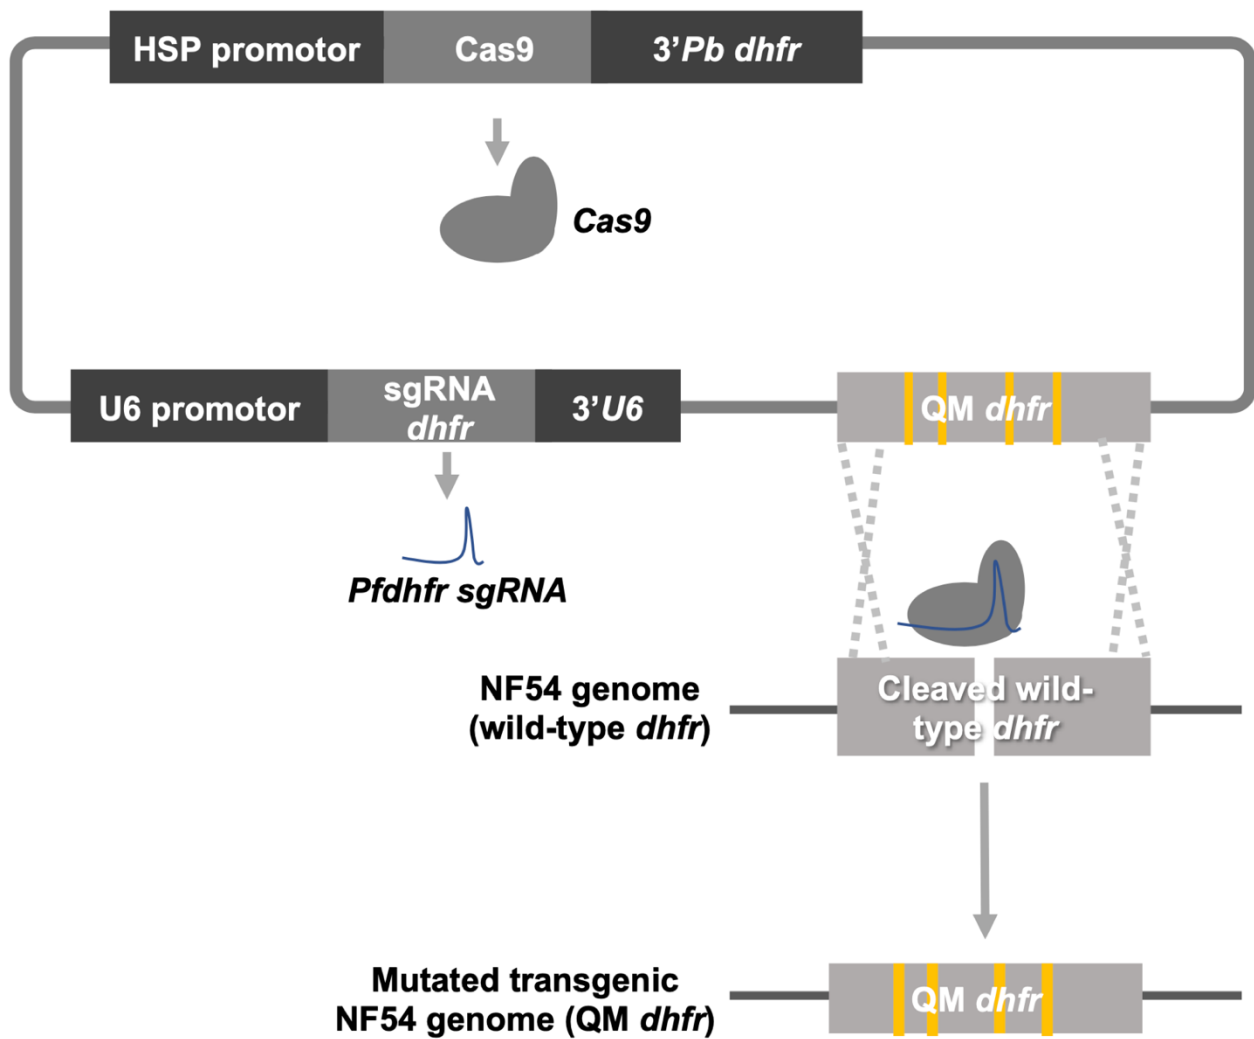

333

334 **Figure 1:** Schematic diagram of the pCas.SgDHFR.HR.V1S plasmid, and the integration of the homology-  
335 directed repair cassette into the wild-type *dhfr* locus of the NF54 strain *P. falciparum* to introduce quadruple  
336 mutations in the *Pfdhfr* gene.



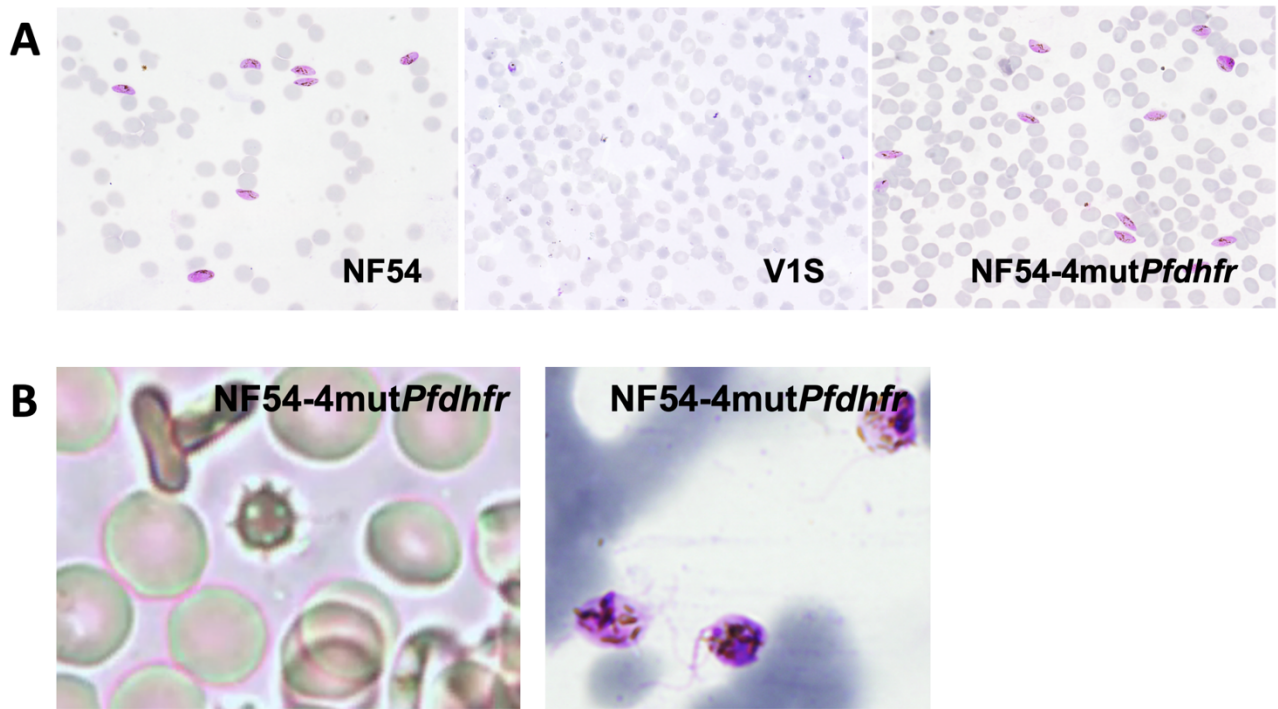

342

343 **Figure 3.** Transgenic NF54-4mutPfdhfr maintains ability to develop into active gametocytes. A) Giemsa stain  
344 of thin blood smear of gametocyte culture. B) bright field (left) and Giemsa stained (right) images of activated  
345 NF54-4mutPfdhfr male gametocytes.

346

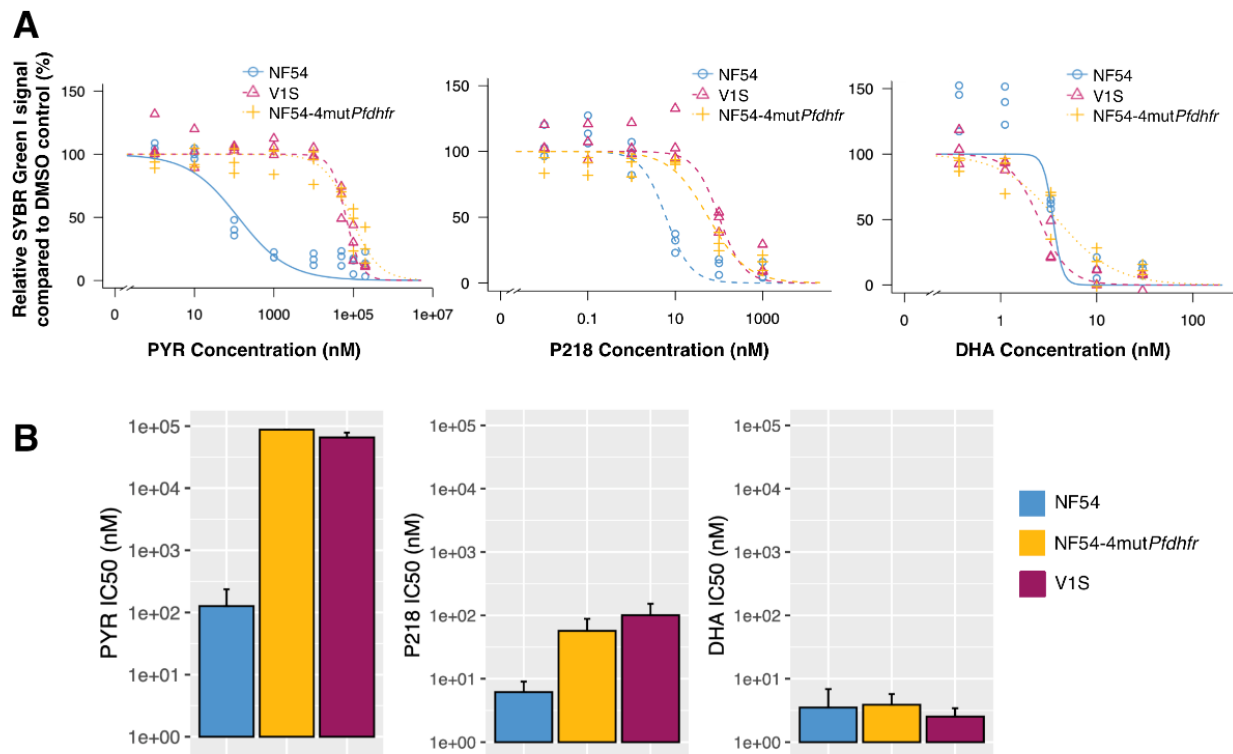

347

348 **Figure 4.** Antimalarial activity of PYR, P218, and DHA in asexual stage of NF54, NF54-4mutPfdhfr, and V1/S  
349 strains *P. falciparum*. A) Dose response curves of PYR, P218, and DHA. B) Bar charts representing asexual  
350 stage IC<sub>50</sub> values of of PYR, P218, and DHA in NF54, NF54-4mutPfdhfr, and V1/S strains *P. falciparum*  
351 bars represent 95% confidence intervals ( $\pm 2SD$ ) of the IC<sub>50</sub> values.



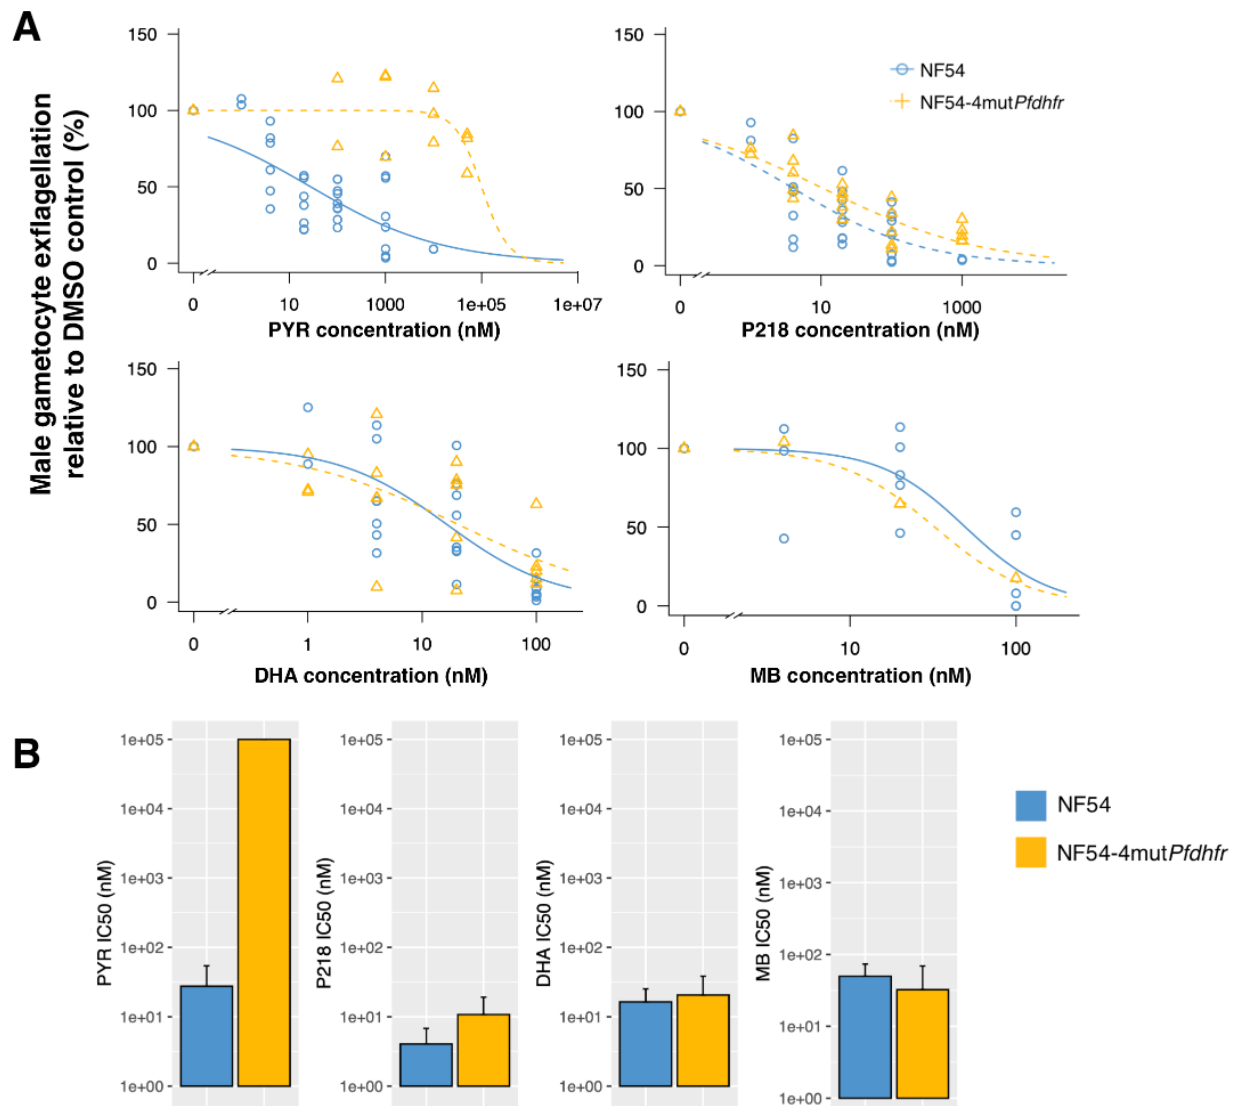

352

353 **Figure 5.** Exflagellation inhibition of PYR, P218, and DHA in NF54 and NF54-4mutPfdhfr strains *P. falciparum*.

354 A) Dose response curve of PYR, P218, and DHA. B) Bar chart representing asexual stage IC<sub>50</sub> values of PYR,

355 P218, and DHA in NF54 and NF54-4mutPfdhfr. Error bars represent 95% confidence intervals ( $\pm 2SD$ ) of the IC<sub>50</sub>

356 values.

357

358

359 **Table 1.** Asexual blood stage IC<sub>50</sub> of PYR, P218, and DHA in the NF54, NF54-4mut*Pfdhfr*, and V1/S  
 360 parasites

| <i>P. falciparum</i> strain | PYR (nM)                                   |                               | P218 (nM)                                  |                               | DHA (nM)                                   |                               |
|-----------------------------|--------------------------------------------|-------------------------------|--------------------------------------------|-------------------------------|--------------------------------------------|-------------------------------|
|                             | Asexual blood stage IC <sub>50</sub> (±SD) | Fold of NF54 IC <sub>50</sub> | Asexual blood stage IC <sub>50</sub> (±SD) | Fold of NF54 IC <sub>50</sub> | Asexual blood stage IC <sub>50</sub> (±SD) | Fold of NF54 IC <sub>50</sub> |
| eNF54                       | 126.56 (±54.90)                            | 1                             | 6.15 (±1.42)                               | 1                             | 3.52 (±1.66)                               | 1                             |
| V1S                         | 65573.92 (±6499.00)                        | 518.13                        | 100.69 (± 26.07)                           | 16.37                         | 2.53 (±0.44)                               | 0.72                          |
| NF54-4mut <i>Pfdhfr</i>     | 87,590.94 (±12,430.96)                     | 692.09                        | 56.94 (± 15.69)                            | 9.26                          | 3.89 (±0.90)                               | 1.11                          |

361

362 **Table 2.** Exflagellation IC<sub>50</sub> of PYR, P218, and DHA in the NF54 and NF54-4mut*Pfdhfr* parasites

| <i>P. falciparum</i> strain | PYR (nM)                              |                               | P218 (nM)                             |                               | DHA (nM)                              |                               | MB (nM)                               |                               |
|-----------------------------|---------------------------------------|-------------------------------|---------------------------------------|-------------------------------|---------------------------------------|-------------------------------|---------------------------------------|-------------------------------|
|                             | Exflagellation IC <sub>50</sub> (±SD) | Fold of NF54 IC <sub>50</sub> | Exflagellation IC <sub>50</sub> (±SD) | Fold of NF54 IC <sub>50</sub> | Exflagellation IC <sub>50</sub> (±SD) | Fold of NF54 IC <sub>50</sub> | Exflagellation IC <sub>50</sub> (±SD) | Fold of NF54 IC <sub>50</sub> |
| NF54                        | 27.55 (±13.24)                        | 1                             | 4.06 (±1.36)                          | 1                             | 16.39 (±4.43)                         | 1                             | 49.60 (±11.56)                        | 1                             |
| NF54-4mut <i>Pfdhfr</i>     | 99,885 (±120,920)                     | 3625.59                       | 10.74 (± 4.22)                        | 2.65                          | 20.56 (±8.84)                         | 1.25                          | 32.42 (±17.74)                        | 0.65                          |

363

364

365 **Authors' Contributions**

366 **Navaporn Posayapisit:** Methodology, Validation, Formal analysis, Investigation, Writing - Original Draft,  
367 Writing - Review & Editing

368 **Jutharat Pengon:** Methodology, Validation, Formal analysis, Investigation, Writing - Original Draft, Writing -  
369 Review & Editing

370 **Parichat Prommana:** Methodology, Validation, Formal analysis, Investigation, Writing - Review & Editing

371 **Molnipha Shoram:** Investigation

372 **Yongyuth Yuthavong:** Resources, Writing - Review & Editing

373 **Chairat Uthaipibull:** Methodology, Resources, Funding acquisition

374 **Sumalee Kamchonwongpaisan:** Methodology, Resources, Writing - Review & Editing, Funding acquisition

375 **Natapong Jupatanakul:** Conceptualization, Methodology, Validation, Formal analysis, Investigation,  
376 Resources, Writing - Original Draft, Writing - Review & Editing, Visualization, Supervision, Project  
377 administration, Funding acquisition

378

379 **Declaration of Conflicting Interests**

380 The generated transgenic parasite has been filed for a Thai petty patent.

381
